# Supplementary material
Source: bioRxiv or medRxiv preprint supplement (https://www.biorxiv.org/highwire/filestream/46424/field_highwire_adjunct_files/1/131292-2.pdf)
Supplement: Supplementary file [file 131292-2.pdf]

**Table S1.** Data on the N=24 environmental biology journals used in our survey of editorial board geography.

| Journal                                                                        | Editors<br>1985 | Countries<br>1985 | Editors<br>2014 | Countries<br>2014 | Total Editors<br>1985-2014 | Total Countries<br>1985-2014 |
|--------------------------------------------------------------------------------|-----------------|-------------------|-----------------|-------------------|----------------------------|------------------------------|
| <i>Agronomy Journal</i>                                                        | 43              | 1                 | 127             | 16                | 525                        | 24                           |
| <i>American Journal of Botany</i>                                              | 6               | 1                 | 48              | 7                 | 116                        | 8                            |
| <i>American Naturalist</i>                                                     | 5               | 1                 | 66              | 10                | 290                        | 18                           |
| <i>Annual Review of Ecology,<br/>Evolution, &amp; Systematics</i> <sup>1</sup> | 8               | 1                 | 9               | 3                 | 42                         | 3                            |
| <i>Biological Conservation</i>                                                 | 28              | 18                | 49              | 13                | 135                        | 24                           |
| <i>Biotropica</i>                                                              | 3               | 1                 | 48              | 19                | 181                        | 35                           |
| <i>Conservation Biology</i>                                                    | 26*             | 6*                | 70              | 17                | 219                        | 23                           |
| <i>Ecography</i> <sup>2</sup>                                                  | 5               | 1                 | 34              | 14                | 58                         | 16                           |
| <i>Ecology</i>                                                                 | 23              | 2                 | 130             | 13                | 423                        | 17                           |
| <i>Evolution</i>                                                               | 16              | 3                 | 63              | 11                | 417                        | 20                           |
| <i>Forest Ecology and Management</i>                                           | 27              | 12                | 51              | 16                | 170                        | 34                           |
| <i>Functional Ecology</i>                                                      | 22*             | 7*                | 63              | 16                | 137                        | 21                           |
| <i>Journal of Animal Ecology</i>                                               | 11              | 4                 | 65              | 14                | 135                        | 18                           |
| <i>Journal of Applied Ecology</i>                                              | 16              | 3                 | 58              | 15                | 146                        | 20                           |
| <i>Journal of Biogeography</i>                                                 | 25              | 8                 | 54              | 19                | 123                        | 20                           |
| <i>Journal of Ecology</i>                                                      | 10              | 1                 | 68              | 18                | 145                        | 23                           |
| <i>Journal of Tropical Ecology</i>                                             | 11              | 9                 | 14              | 6                 | 36                         | 20                           |
| <i>Journal of Zoology</i>                                                      | 1               | 1                 | 29              | 11                | 81                         | 15                           |
| <i>Landscape Ecology</i>                                                       | 19*             | 10*               | 57              | 16                | 156                        | 25                           |
| <i>New Phytologist</i>                                                         | 10              | 1                 | 38              | 12                | 68                         | 13                           |
| <i>N. Am. J. of Fisheries Management</i>                                       | 16              | 2                 | 25              | 3                 | 252                        | 4                            |
| <i>Oecologia</i>                                                               | 24              | 8                 | 136             | 26                | 314                        | 30                           |
| <i>Oikos</i>                                                                   | 12              | 4                 | 60              | 19                | 122                        | 20                           |
| <i>Plant Ecology</i> <sup>3</sup>                                              | 18              | 12                | 47              | 15                | 174                        | 32                           |

<sup>1</sup>Named *Annual Review of Ecology & Systematics* through 2002. <sup>2</sup>Named *Holarctic Ecology* through 1991 <sup>3</sup>Named *Vegetatio* through 1996 \*Values for 1987, the first year the journal was published
